# Supplementary material for: Does persistent precarious employment affect health outcomes among working age adults? A systematic review and meta-analysis
Source: HighWire-hosted journal article supplement (doi:10.1136/jech-2022-219292), 2022-09-22
Supplement: jech-2022-219292supp001_data_supplement.pdf [file jech-2022-219292supp001_data_supplement.pdf]

# **Does persistent precarious employment affect health outcomes among working age adults? A systematic review and meta-analysis**

## **Additional file 1: Search strategy, PRISMA flowchart and description of studies**

(TITLE-ABS(precaarity) OR TITLE-ABS(precaariat) OR TITLE-ABS("precarious employment") OR TITLE-ABS("precarious work") OR TITLE-ABS("employment security") OR TITLE-ABS("employment insecurity") OR TITLE-ABS("secure employment") OR TITLE-ABS("insecure employment") OR TITLE-ABS("job security") OR TITLE-ABS("job insecurity") OR TITLE-ABS("low pay no pay cycle") OR TITLE-ABS("flexible labo\*r") OR TITLE-ABS("dual labo\*r") OR TITLE-ABS("temporary employment") OR TITLE-ABS("temporary contract\*") OR TITLE-ABS("zero hour contract\*") OR TITLE-ABS("gig economy") OR TITLE-ABS("contingent work\*") OR TITLE-ABS("contingent employment") OR TITLE-ABS("secondary labo\*r market") OR TITLE-ABS(flexicurity) OR TITLE-ABS("non-standard work") OR TITLE-ABS("non-standard employment") OR TITLE-ABS("non-standard contract\*") OR TITLE-ABS(underemployment) OR TITLE-ABS("atypical work") OR TITLE-ABS("casual work\*") OR TITLE-ABS("casual employment") OR TITLE-ABS("casual labo\*r") OR TITLE-ABS("non-permanent employ\*") OR TITLE-ABS("non-permanent work\*") OR TITLE-ABS("exclusionary employment") OR TITLE-ABS("employment history\*") OR TITLE-ABS("employment trajectory\*") OR TITLE-ABS("employment transition\*") OR

TITLE-ABS("job transition\*") OR TITLE-ABS("job separation\*") OR TITLE-ABS("job trajector\*"))

AND

(TITLE-ABS(health) OR TITLE-ABS(wellbeing) OR TITLE-ABS(death) OR TITLE-ABS(hospitali\*ation) OR TITLE-ABS(prescri\*) OR TITLE-ABS(injur\*) OR TITLE-ABS(absen\*) OR TITLE-ABS(mortality) OR TITLE-ABS(illness) OR TITLE-ABS(disease) OR TITLE-ABS("ill health") OR TITLE-ABS(sick\*) OR TITLE-ABS(morbidity) OR TITLE-ABS(disabilit\*) OR TITLE-ABS(disabled))

**Figure S2.1: Scopus search strategy**

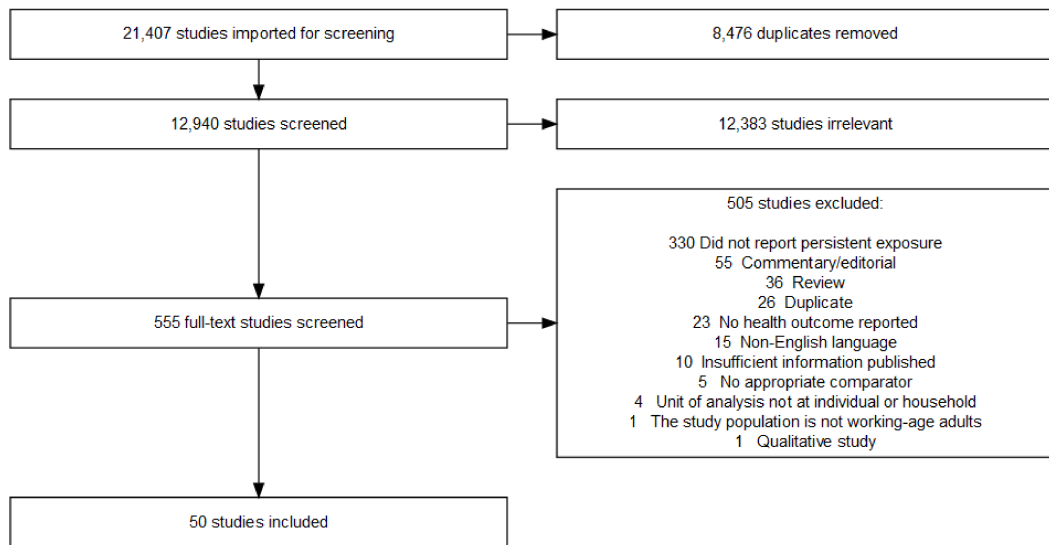

**Figure S2.2: Preferred Reporting Items for Systematic Reviews and Meta-Analyses (PRISMA) flow diagram for study selection**

| <b>Study</b>              | <b>First author (year)</b> | <b>Country</b> | <b>Study design</b> | <b>Study population</b>                                            | <b>Risk of bias</b> | <b>Exposure</b>                           | <b>Outcome</b>                                                                                                                                                                                                           |
|---------------------------|----------------------------|----------------|---------------------|--------------------------------------------------------------------|---------------------|-------------------------------------------|--------------------------------------------------------------------------------------------------------------------------------------------------------------------------------------------------------------------------|
| 10-Town Study             | Kivimaki, M (2003)         | Finland        | Cohort              | Municipal employees and long-term underemployed (aged 18-63 years) | Medium              | Employment contract: temporary employment | General health: all-cause mortality<br><br>Physical health: cardiovascular disease mortality, cancer mortality, external causes mortality<br><br>Health behaviours: alcohol-related mortality; smoking-related mortality |
| 1970 British Cohort Study | Emerson, E (2018)          | UK             | Cohort              | Working age adult (1970 cohort)                                    | Medium              | Employment contract: non-                 | General health: self-rated health                                                                                                                                                                                        |

|                                                         |                      |        |        |                                        |            | standard<br>employment                                   | Mental health: malaise score                                                                                                                 |
|---------------------------------------------------------|----------------------|--------|--------|----------------------------------------|------------|----------------------------------------------------------|----------------------------------------------------------------------------------------------------------------------------------------------|
| American's<br>Changing Lives<br>(ACL) study             | Burgard, S<br>(2009) | USA    | Cohort | Working age<br>adults (25 and<br>over) | Mediu<br>m | Perceived job<br>security                                | General health: self-rated<br>health<br><br>Mental health: depressive<br>symptoms                                                            |
|                                                         | Burgard, S<br>(2017) |        |        |                                        |            |                                                          |                                                                                                                                              |
| British Household<br>Panel Survey<br>(BHPS)             | Bender, K<br>(2018)  | UK     | Cohort | Working age<br>adults                  | Low        | Employment<br>contract: % time in<br>flexible employment | General health: self-rated<br>health<br><br>Physical health: heart<br>health; stomach health;<br>breathing health; migraine;<br>skin/allergy |
| Canadian National<br>Population Health<br>Survey (NPHS) | Dobson, K<br>(2018)  | Canada | Cohort | Working age<br>adults                  | Low        | Perceived job<br>security                                | Health behaviours: smoking<br>status                                                                                                         |

|                                                                         |                             |         |        |                                                            |        |                                                                        |                                           |
|-------------------------------------------------------------------------|-----------------------------|---------|--------|------------------------------------------------------------|--------|------------------------------------------------------------------------|-------------------------------------------|
|                                                                         | Watson, B<br>(2017)         |         |        |                                                            | Medium | Perceived job security                                                 | Mental health: psychological distress     |
| Canadian Survey of Labour and Income Dynamics (SLID)                    | Scott-Marshall, H<br>(2019) | Canada  | Cohort | Working age adults (economically active, aged 25-54 years) | High   | Perceived job security                                                 | General health: self-rated health         |
| Compulsory Communications (linked workforce and prescription registers) | Moscone, F<br>(2016)        | Italy   | Cohort | Adults                                                     | Medium | Multiple: temporary employment and number of contract changes          | Mental health: mental health prescription |
| Danish Longitudinal Study on Work, Unemployment and Health (linked to   | Rugulies, R<br>(2010)       | Denmark | Cohort | Working age adults (37-56 years)                           | Medium | Multiple: perceived job security and history of prolonged unemployment | Mental health: mental health prescription |

prescriptions and  
employment  
registers)

|                                                                                  |                       |         |        |                                                                        |      |                                                     |                                        |
|----------------------------------------------------------------------------------|-----------------------|---------|--------|------------------------------------------------------------------------|------|-----------------------------------------------------|----------------------------------------|
| European Union<br>Statistics on<br>Income and Living<br>Conditions (EU-<br>SILC) | Pirani, E<br>(2015)   | Italy   | Cohort | Working age<br>adults                                                  | Low  | Employment<br>contract: temporary<br>employment     | General health: self-rated<br>health   |
| Finnish census<br>linked to deaths<br>register                                   | Pensola, T<br>(2004)  | Finland | Cohort | Working age<br>adults (30-34<br>years at end of<br>exposure<br>period) | Low  | Employment spells:<br>fragmented<br>employment path | General health: all-cause<br>mortality |
| Finnish Public<br>Sector (FPS) Study                                             | Virtanen, P<br>(2018) | Finland | Cohort | Public sector<br>employees                                             | High | Employment<br>contract: temporary<br>employment     | General health: self-rated<br>health   |

|                                                        |                     |         |                 |                                                            |        |                                                       |                                                                                                 |
|--------------------------------------------------------|---------------------|---------|-----------------|------------------------------------------------------------|--------|-------------------------------------------------------|-------------------------------------------------------------------------------------------------|
| Health and Social Support (HeSSup) Study               | Virtanen, P (2008)  | Finland | Cohort          | Working age adults (economically active, aged 20-54 years) | Medium | Employment contract: atypical employees or unemployed | Health behaviours: tobacco consumption; alcohol consumption; body mass index; physical activity |
| Health Conditions and Access to Health Services Survey | Fiori, F (2016)     | Italy   | Cross-sectional | Working age adults (economically active, aged 18-39 years) | Medium | Employment contract: temporary or atypical employment | Mental health: mental health symptoms                                                           |
| Household Panel Comparability Project                  | Rodriguez, E (2002) | Germany | Cohort          | Working age adults (aged 16 years and over)                | Low    | Employment contract: temporary employment             | General health: self-rated health                                                               |
| Japanese Study on Stratification, Health, Income,      | Kachi, Y (2018)     | Japan   | Cohort          | Working age adults (aged 25-50 years)                      | High   | Employment contract: non-standard employment          | Mental health: psychological distress                                                           |



---

 and Neighborhood

(J-SHINE)

|                                                      |                      |                |        |                                              |        |                                                        |                                                                                 |
|------------------------------------------------------|----------------------|----------------|--------|----------------------------------------------|--------|--------------------------------------------------------|---------------------------------------------------------------------------------|
|                                                      | Sato, Y<br>(2018)    |                |        |                                              | Medium | Employment<br>contract: temporary<br>employment        | Physical health: tooth loss                                                     |
| Korean Labor and<br>Income Panel<br>Study            | Lim, H<br>(2015)     | South<br>Korea | Cohort | Working age<br>adults (aged 20-<br>60 years) | High   | Employment<br>contract: non-<br>standard<br>employment | General health: self-rated<br>health                                            |
| Korean<br>Longitudinal<br>Survey of Aging<br>(KLoSA) | Jin-man, C<br>(2015) | South<br>Korea | Cohort | Adults (aged 45<br>years and older)          | Low    | Employment spells:<br>number of jobs                   | Mental health: major<br>depressive symptoms<br><br>Physical health: comorbidity |
| Korean Welfare<br>Panel Study                        | Yoo, K<br>(2016)     | South<br>Korea | Cohort | Working age<br>adults                        | Medium | Employment<br>contract: temporary<br>employment        | Mental health: depressive<br>symptoms                                           |

---

|                                                                                                                              |                      |         |                     |                                              |            |                                                        |                                                                               |
|------------------------------------------------------------------------------------------------------------------------------|----------------------|---------|---------------------|----------------------------------------------|------------|--------------------------------------------------------|-------------------------------------------------------------------------------|
| lidA study,<br>Integrated<br>Employment<br>Biography (IEB)<br>register data of the<br>German Federal<br>Employment<br>Agency | Burr, H<br>(2015)    | Germany | Cross-<br>sectional | Working age<br>adults                        | Mediu<br>m | Employment<br>contract: non-<br>standard<br>employment | Mental health: major<br>depressive symptoms                                   |
| Longitudinal<br>Survey of Middle-<br>aged and Elderly<br>Persons (LSMEP)                                                     | Kachi, Y<br>(2014)   | Japan   | Cohort              | Working age<br>adults (aged 50-<br>59)       | Low        | Employment<br>contract: non-<br>standard<br>employment | Mental health: psychological<br>distress                                      |
| Midlife in the<br>United States<br>(MIDUS) study                                                                             | Burgard, S<br>(2009) | USA     | Cohort              | Working age<br>adults (aged 25-<br>74 years) | High       | Perceived job<br>security                              | General health: self-rated<br>health<br><br>Mental health: negative<br>affect |

|         |                       |          |        |                                                                   |      |                                      |                                                                                                                                                                                                                                                                                                         |
|---------|-----------------------|----------|--------|-------------------------------------------------------------------|------|--------------------------------------|---------------------------------------------------------------------------------------------------------------------------------------------------------------------------------------------------------------------------------------------------------------------------------------------------------|
| Midspan | Metcalfe, C<br>(2001) | Scotland | Cohort | Working age<br>adults<br>(economically<br>active; aged 35-<br>64) | High | Employment spells:<br>number of jobs | General health: all-cause<br>mortality<br><br>Mental health: psychiatric<br>hospital admission<br><br>Physical health:<br>cardiovascular mortality;<br>non-alcohol or smoking-<br>related cancer mortality<br><br>Health behaviours: smoking-<br>related cancer mortality;<br>alcohol-related mortality |
|         | Metcalfe, C<br>(2003) |          |        |                                                                   |      |                                      | Mental health: psychological<br>distress                                                                                                                                                                                                                                                                |

Physical health: diastolic

blood pressure; lung

function; cholesterol level;

ischemia; angina

Health behaviours: smoking

status; alcohol consumption;

physical activity; body mass

index

|                                                                                                                                     |                     |       |                 |                                          |        |                                              |                                    |
|-------------------------------------------------------------------------------------------------------------------------------------|---------------------|-------|-----------------|------------------------------------------|--------|----------------------------------------------|------------------------------------|
| National health survey “Health and use of health care services” carried out by the Italian National Institute of Statistics (ISTAT) | Barbadoro, P (2016) | Italy | Cross-sectional | Working age adults (economically active) | Medium | Employment contract: non-standard employment | Health behaviours: body mass index |
|-------------------------------------------------------------------------------------------------------------------------------------|---------------------|-------|-----------------|------------------------------------------|--------|----------------------------------------------|------------------------------------|

|                                                      |                     |         |        |                                                             |            |                                                  |                                                                                                                                                                      |
|------------------------------------------------------|---------------------|---------|--------|-------------------------------------------------------------|------------|--------------------------------------------------|----------------------------------------------------------------------------------------------------------------------------------------------------------------------|
| National<br>Longitudinal<br>Survey of Youth          | Dooley, D<br>(1998) | USA     | Cohort | Working age<br>adults (young)                               | Mediu<br>m | Underemployment                                  | Health behaviours: alcohol<br>symptom                                                                                                                                |
|                                                      | Cross, J<br>(2009)  |         |        | Working age<br>adults (aged 24-<br>30 years at<br>baseline) |            |                                                  | General health: self-rated<br>health<br><br>Mental health: depression<br><br>Physical health: chronic<br>conditions<br><br>Health behaviours: alcohol<br>consumption |
| Northern Finland<br>1966 Birth Cohort<br>(NFBC 1966) | Sirvio, A<br>(2012) | Finland | Cohort | Working age<br>adults (cohort at<br>31 years)               | High       | Multiple:<br>discontinuous<br>employment history | Mental health: mental health<br>symptoms                                                                                                                             |

|                                |                      |        |        |                                                                    |      | and non-standard<br>employment                                        |                                                                                  |
|--------------------------------|----------------------|--------|--------|--------------------------------------------------------------------|------|-----------------------------------------------------------------------|----------------------------------------------------------------------------------|
| Northern Swedish<br>Cohort     | Gustafsson, P (2012) | Sweden | Cohort | Working age<br>adults (aged 16<br>at baseline)                     | Low  | Employment<br>contract: temporary<br>employment                       | General health: cortisol<br>levels                                               |
|                                | Virtanen, P (2011)   |        |        | Working age<br>adults (aged 30<br>at baseline, 42<br>at follow-up) | Low  | Multiple: non-<br>standard<br>employment and<br>perceive job security | General health: self-rated<br>health<br>Mental health: mental health<br>symptoms |
| Scania Public<br>Health Cohort | Canivet, C (2017)    | Sweden | Cohort | Working age<br>adults (18-55<br>years)                             | High | Employment<br>contract: atypical<br>employees or<br>unemployed        | Mental health: mental health<br>symptoms                                         |

|                                                                                                                                                                                     |                       |        |              |                                        |        |                                                            |                                     |
|-------------------------------------------------------------------------------------------------------------------------------------------------------------------------------------|-----------------------|--------|--------------|----------------------------------------|--------|------------------------------------------------------------|-------------------------------------|
| Spanish WORKing life social security (WORKss) cohort                                                                                                                                | Lopez Gomez, M (2017) | Spain  | Case-control | Working age adults (aged 16 and over)  | Medium | Employment spells: employment, unemployment and inactivity | General health: all-cause mortality |
| Swedish Twin project Of Disability pension and Sickness Absence (STODS) linked to the National Social Insurance Agency Micro Data for Analyses of Social insurance database (MiDAS) | Helgadottir, B (2019) | Sweden | Cohort       | Working age adults (twins, aged 19-47) | High   | Employment contract: temporary employment or self-employed | Physical health: sickness absence   |

|                                                                                                              |                            |             |        |                                     |     |                                               |                                                                         |
|--------------------------------------------------------------------------------------------------------------|----------------------------|-------------|--------|-------------------------------------|-----|-----------------------------------------------|-------------------------------------------------------------------------|
| Swedish Work Environment Survey (SWES), subset of Swedish Longitudinal Occupational Survey of Health (SLOSH) | Magnusson L Hanson, (2015) | Sweden      | Cohort | Working age adults (20-69)          | Low | Perceived job security: threats of dismissal  | Mental health: depressive symptoms                                      |
| Swiss Household Panel (SHP-III)                                                                              | Giudici, F (2019)          | Switzerland | Cohort | Adults (aged 16-100 years)          | Low | Employment spells: discontinuous work history | General health: depressive symptoms<br>Mental health: self-rated health |
| Temporary Employees in Municipal Jobs Study                                                                  | Virtanen, P (2005)         | Finland     | Cohort | Female public sector employees with | Low | Employment contract: temporary employment     | Mental health: psychological distress                                   |



|                                     |                      |     |        | initially fixed-term contracts                             |      |                                   |                                                                                |
|-------------------------------------|----------------------|-----|--------|------------------------------------------------------------|------|-----------------------------------|--------------------------------------------------------------------------------|
| Three-City Study                    | Coley, R<br>(2014)   | USA | Cohort | Low-income mothers                                         | Low  | Employment spells: number of jobs | General health: self-rated health<br><br>Mental health: mental health symptoms |
| U.S. Panel Study of Income Dynamics | Amick, B<br>(2002)   | USA | Cohort | Working age adults (economically active, aged 18-62 years) |      | Perceived job security            | General health: all-cause mortality                                            |
| Unnamed survey 1                    | Barnett, R<br>(1997) | USA | Cohort | Working age adults (economically active)                   | High | Perceived job security            | Mental health: psychological distress                                          |

|                  |                           |                |                  |                                                             |      |                                                                    |                                           |
|------------------|---------------------------|----------------|------------------|-------------------------------------------------------------|------|--------------------------------------------------------------------|-------------------------------------------|
| Unnamed survey 3 | Johannesse<br>n, H (2013) | Norway         | Cohort           | Working age<br>adults                                       | High | Perceived job<br>security                                          | Mental health: psychological<br>distress  |
| Unnamed survey 4 | Kim, Y<br>(2018)          | South<br>Korea | Cohort           | Sales and office<br>workers in an<br>automobile<br>company  | High | Perceived job<br>security                                          | Mental health: depressive<br>symptoms     |
| Unnamed survey 5 | Reine, I<br>(2008)        | Sweden         | Cohort           | Working age<br>adults (aged 30<br>years at end of<br>study) | High | Employment<br>contract: temporary<br>employment                    | Mental health: mental health<br>symptoms  |
| Unnamed survey 6 | Heaney, C<br>(1994)       | USA            | Cohort           | Automobile<br>manufacturer<br>employees                     | High | Perceived job<br>security                                          | General health: physical<br>symptomology  |
| Unnamed survey 7 | Jahn, I<br>(1995)         | Germany        | Case-<br>control | Adult males<br>(born after<br>1912)                         | High | Employment spells:<br>job changes by level<br>of (in)voluntariness | Physical health: lung cancer<br>diagnosis |

|                                             |                     |     |        |                                                              |      |                                                                          |                                                                                                                                                   |
|---------------------------------------------|---------------------|-----|--------|--------------------------------------------------------------|------|--------------------------------------------------------------------------|---------------------------------------------------------------------------------------------------------------------------------------------------|
| Unnamed survey 8                            | Moore, S<br>(2004)  | USA | Cohort | Employees<br>within a large<br>manufacturing<br>organisation | High | Layoff contact:<br>number of layoff<br>contacts (direct and<br>indirect) | Mental health: Depressive<br>symptoms<br><br>Physical health: self-<br>reported health problems                                                   |
| US Health and<br>Retirement Survey<br>(HRS) | Gallo, W<br>(2006)  | USA | Cohort | Working age<br>adults (aged 51-<br>61 years)                 | High | Employment spells:<br>number of job losses                               | Mental health: depressive<br>symptoms                                                                                                             |
| Whitehall II                                | Ferrie, J<br>(2002) | UK  | Cohort | Civil servants<br>(aged 25-55<br>years)                      | Low  | Perceived job<br>security                                                | General health: self-rated<br>health<br><br>Mental health: mental health<br>symptoms<br><br>Physical health: cholesterol<br>level; blood pressure |

|                                                      |                   |       |        |                                          |        |                                                                                                                                  |                                                                            |
|------------------------------------------------------|-------------------|-------|--------|------------------------------------------|--------|----------------------------------------------------------------------------------------------------------------------------------|----------------------------------------------------------------------------|
|                                                      |                   |       |        |                                          |        |                                                                                                                                  | Health behaviours: body mass index; alcohol consumption; smoking status    |
| Work and Health Histories Italian Panel (WhipSalute) | Giraudo, M (2016) | Italy | Cohort | Working age adults                       | Medium | Multiple: number of contracts, number of jobs, occupational sector, work intensity, duration of longest period of non-employment | Physical health: injury                                                    |
| Work, Stress, and Health (WSH) study                 | Glavin, P (2015)  | USA   | Cohort | Working age adults (economically active) | Low    | Perceived job security                                                                                                           | General health: self-rated health<br>Mental health: psychological distress |

**Table S2.1: Summary of studies included in the systematic review**

## **Additional File 4: Narrative synthesis**

An exact binomial test was run for each exposure/outcome grouping with confidence intervals calculated using the Wilson method.[1] Harvest plots were created to visually summarise the direction of effect estimates by outcome as a means of synthesising studies where there were a mix of binary and continuous exposure and outcomes measures, meaning that meta-analysis was not feasible.[1, 2]

Each bar in the harvest plots relates to a data point in the extracted data. Bars are coloured-coded by exposure topic, while the height of the bar relates to whether the study the data point is drawn from was classified as high, medium or low risk of bias according to the amended Effective Public Health Practice Project (EPHPP) Quality Assessment tool for Quantitative Studies. Low risk of bias is represented as the tallest bar. Multiple bars can be presented for one study where the PECOS definition is independent of other bars (e.g. separate estimates for male and female subjects in studies where a total effect size estimate was not presented for both sexes).

### **General health outcomes**

Included studies reported five general health outcomes: all-cause mortality, self-rated health, sickness absence, somatic symptoms and stress response measures (see Additional file 4). Twenty-six out of 35 data points showed poorer self-rated health among people with persistent precarious employment than in the study comparator group (74.3%, 95% CI: 56.7% to 87.5%). There was no clear evidence of associations for the other outcome measures.

### **Mental health outcomes**

Mental health service use and symptoms of poor mental health were the most common reported outcomes (see Additional File 4). Fifty-six out of 67 data points showed a worse outcome than the study comparator group (83.6%; 95% CI 72.5% to 91.5%).

### **Physical health outcomes**

Studies identified in the review related to twelve physical health outcomes: blood pressure, cancer, cardiovascular disease, chronic conditions, dental problems, digestive problems, mortality due to external causes, health problems, injury, migraine, respiratory disease and skin conditions/allergy (see Additional file 4). There was clear evidence that persistent precarious employment was associated only with injury. All six data points showed a worse outcome than the study comparator group (100%; 95% CI 54.1% to 100%), extracted from a single study classified as medium risk of bias.[3]

### **Health behaviour outcomes**

Identified studies assessed six health behaviour outcomes: alcohol consumption, alcohol outcomes, body mass index, physical activity, smoking outcomes and tobacco consumption (see Additional File 4). Persistent precarious employment was most clearly associated with increased alcohol consumption and body mass index. Nine out of ten data points relating to alcohol consumption showed a worse outcome than the study comparator group (90.0%, 95% CI 55.5% to 99.7%). Fourteen out of 16 data points relating to body mass index showed a worse

outcome than the study comparator group (87.5%, 95% CI 61.6% to 98.4%).

There was no clear evidence of associations for the other outcome measures.

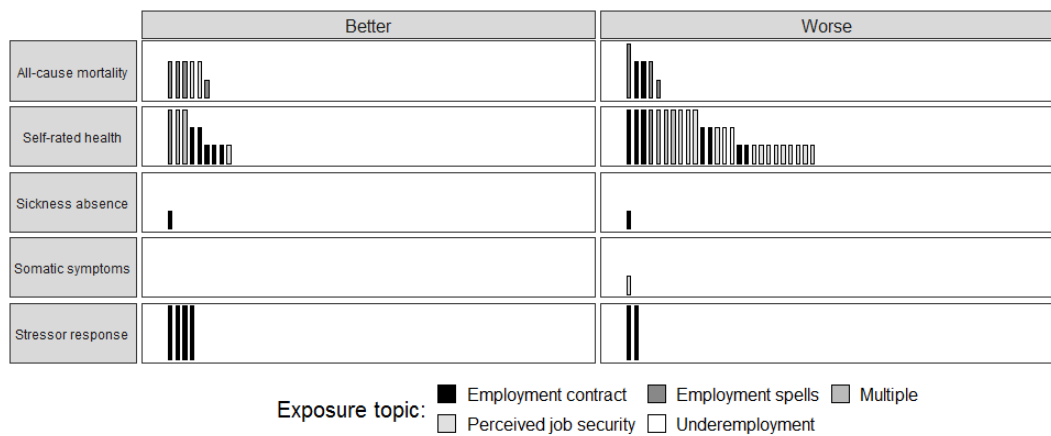

**Figure S4.1: Harvest plot of general health outcomes**

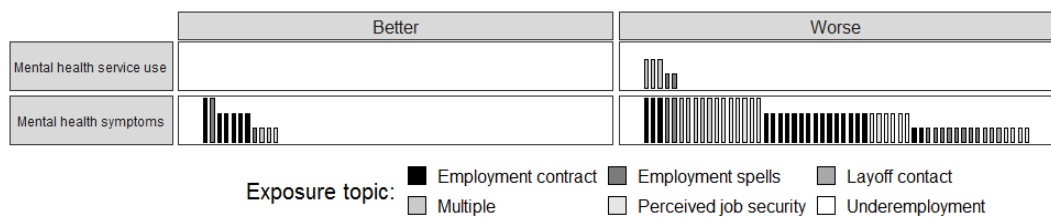

**Figure S4.2: Harvest plot of mental health outcomes**



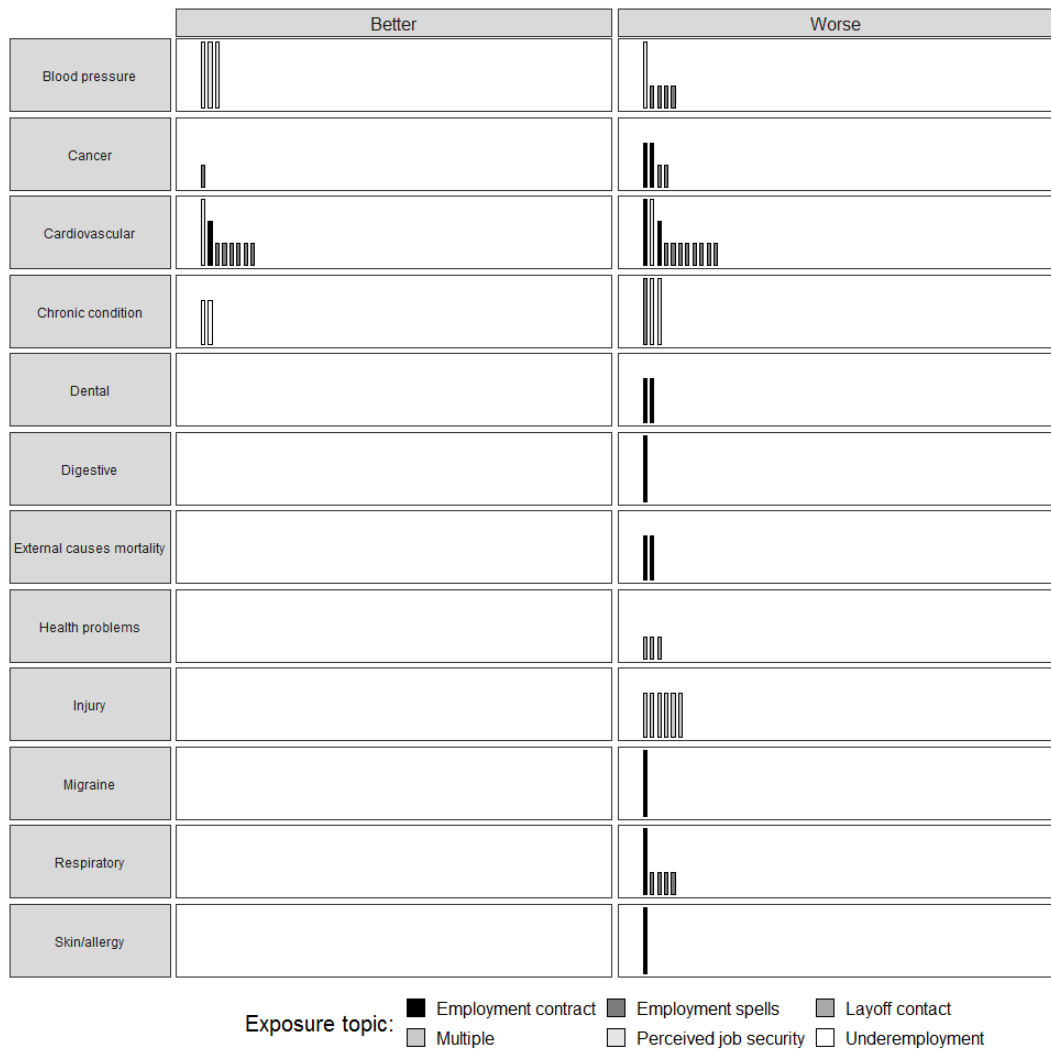

**Figure S4.3: Harvest plot of physical health outcomes**

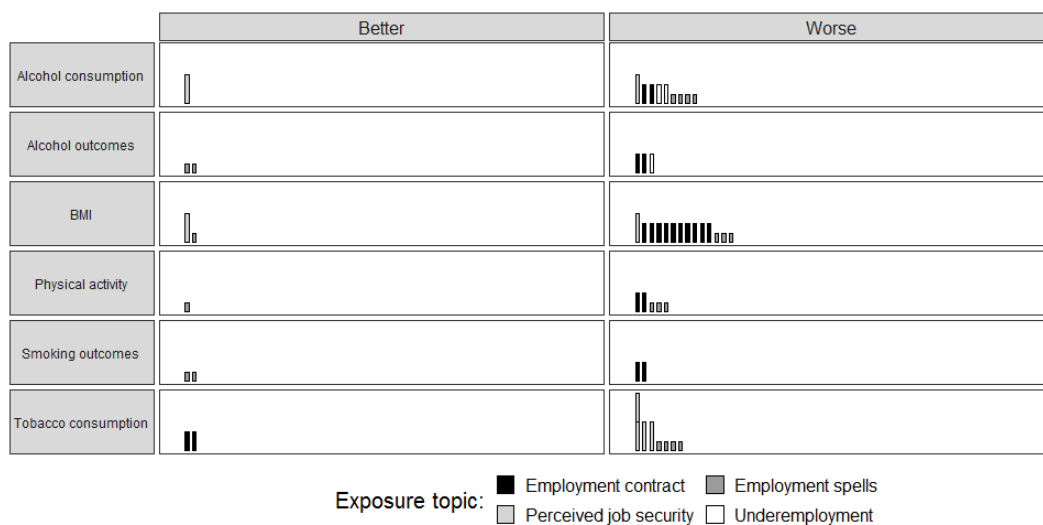

**Figure S4.4: Harvest plot of health behaviour outcomes**

## Additional file 5: Self-rated health meta-analyses stratified by sub-group

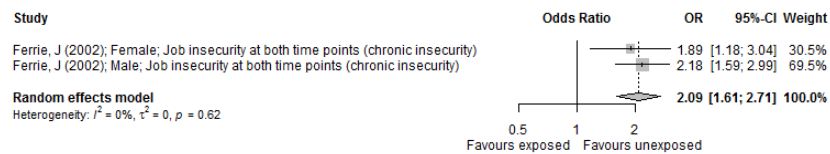

**Figure S5.1: Forest plot presenting effect sizes and meta-analysis of poor self-rated health by persistent perceived job security**

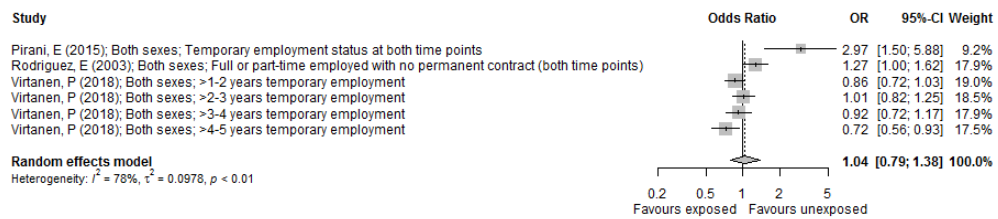

**Figure S5.2: Forest plot presenting effect sizes and meta-analysis of poor self-rated health by persistent employment contract**

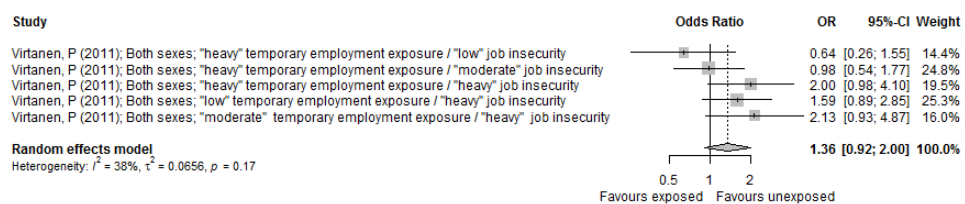

**Figure S5.3: Forest plot presenting effect sizes and meta-analysis of poor self-rated health by persistent multi-dimensional measure of precarious employment**

## **Additional File 6: Sub-group meta-analysis**

Sub-group analyses were undertaken for males and females for all meta-analyses with the exceptions of self-rated health as a continuous scale and mental health symptoms as a continuous outcome measure on the CES-D scale, due to insufficient data points. We have presented male and female only versions of the meta-analyses presented in our main analysis. There were insufficient male and female estimates to conduct sub-group meta-analysis of self-rated health as a continuous scale and symptoms of poor mental health as a continuous outcome measure on the CES-D scale. We found no clear differences between sex-specific pooled estimates.

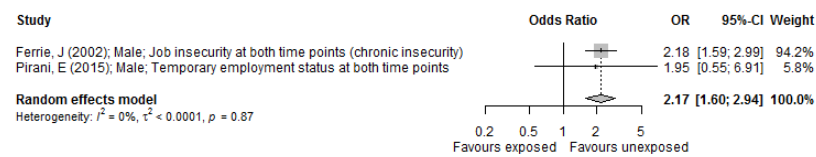

(a) Male poor self-rated health as a binary outcome

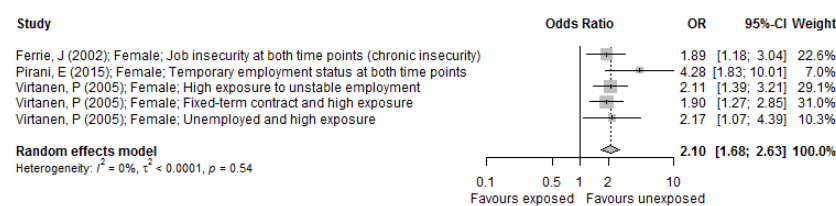

(b) Female poor self-rated health as a binary outcome

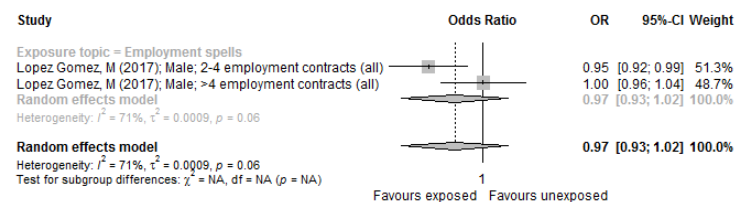

(c) Male all-cause mortality

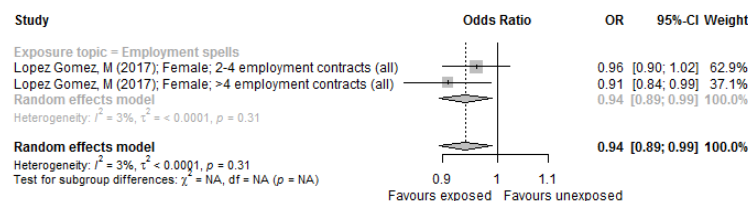

(d) Female all-cause mortality

**Figure 6.1: Forest plots presenting effect sizes and meta-analysis of selected general health outcomes by persistent precarious employment exposure**

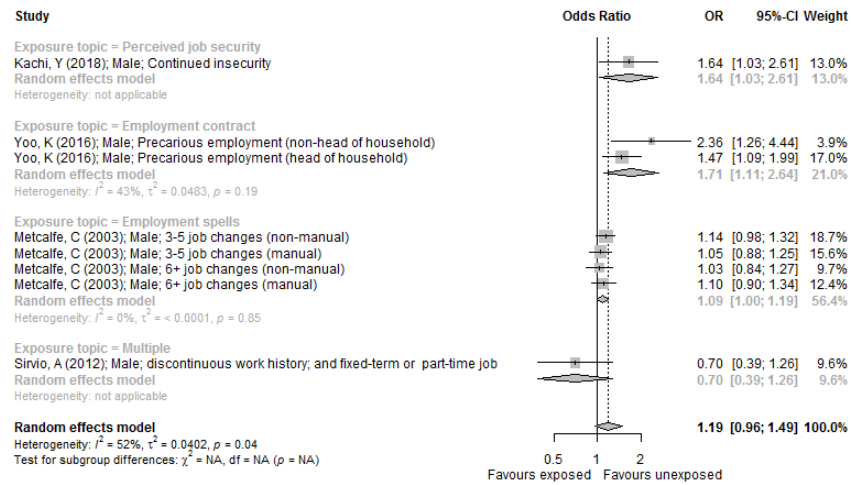

(a) Male poor mental health as a binary outcome

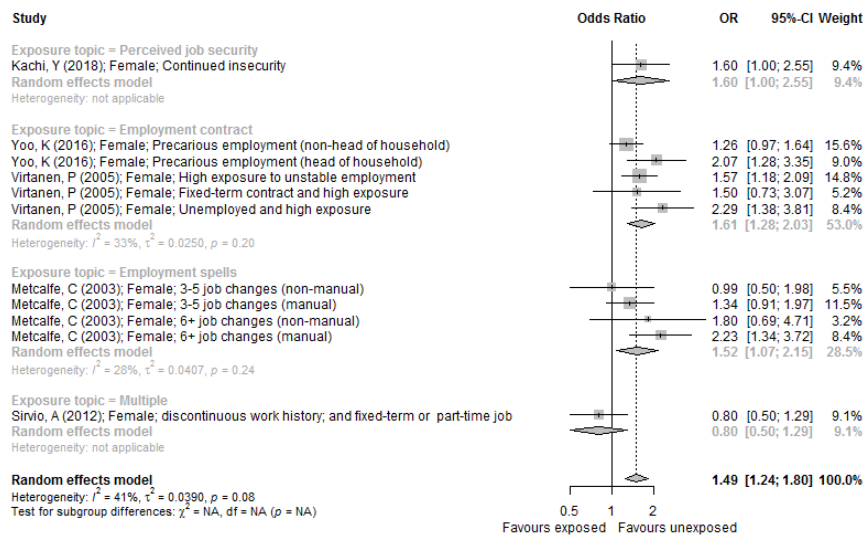

(b) Female poor mental health as a binary outcome

**Figure 6.2: Forest plots presenting effect sizes and meta-analysis of selected mental health outcomes by persistent precarious employment exposure**

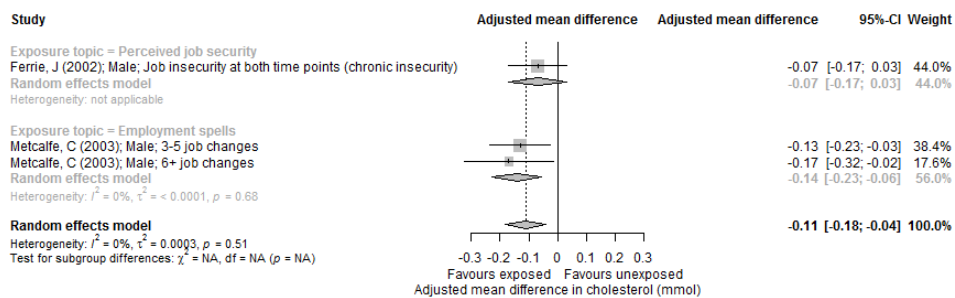

(a) Male cholesterol level

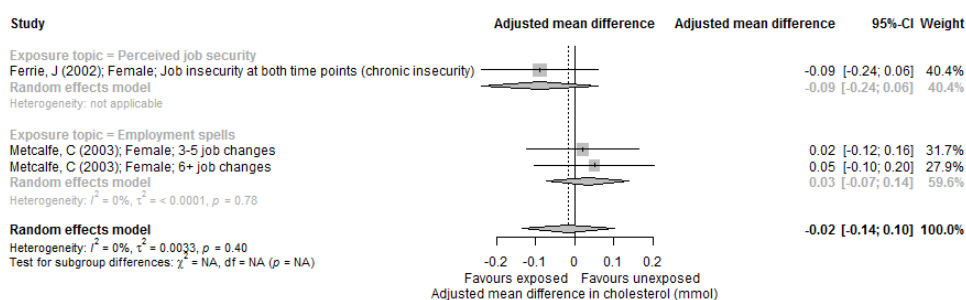

(b) Female cholesterol level

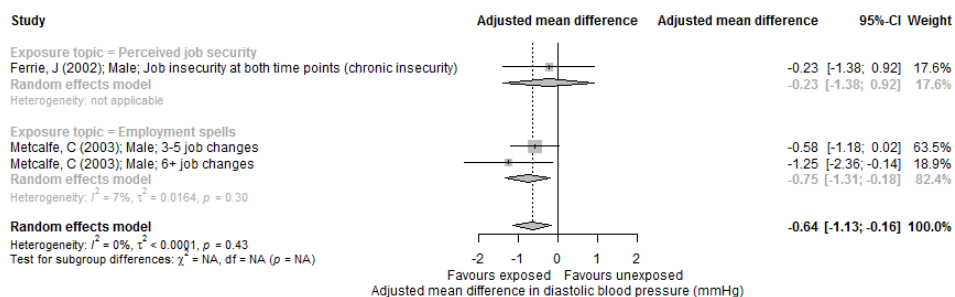

(c) Male diastolic blood pressure

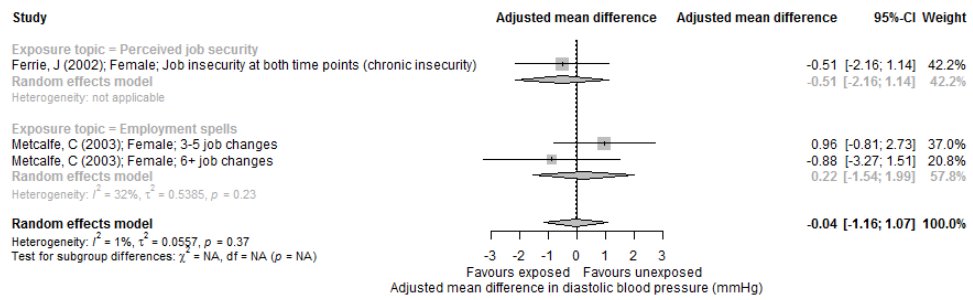

(d) Male diastolic blood pressure

**Figure 6.3: Forest plots presenting effect sizes and meta-analysis of selected physical health outcomes by persistent precarious employment exposure**



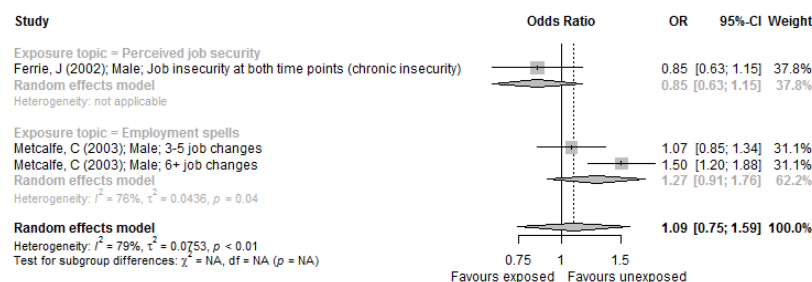

(a) Male harmful alcohol consumption

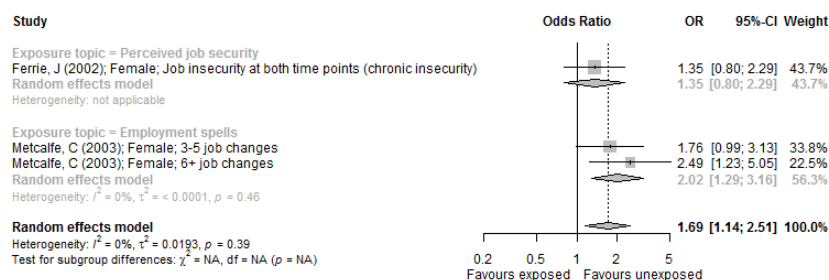

(b) Female harmful alcohol consumption

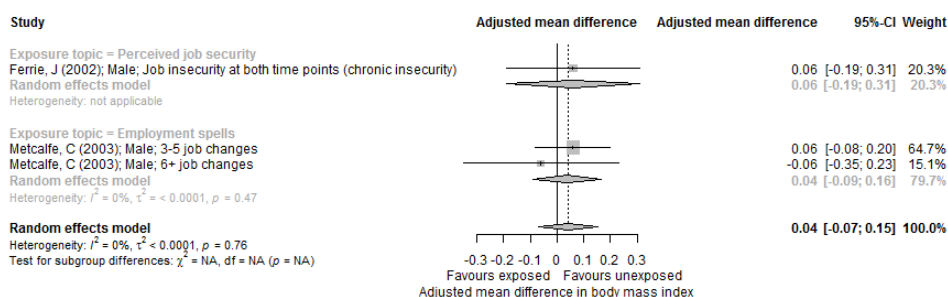

(c) Male body mass index

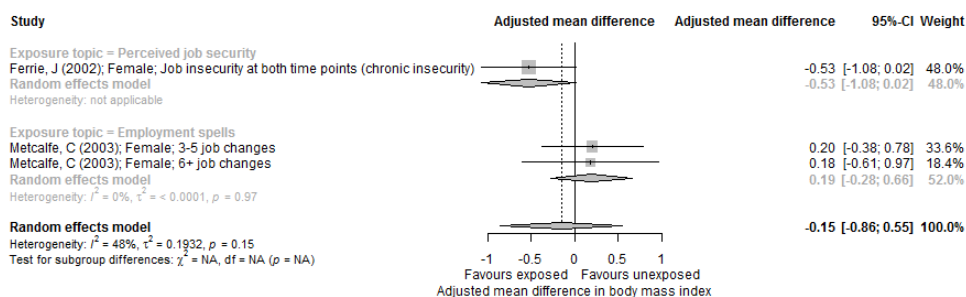

(d) Female body mass index

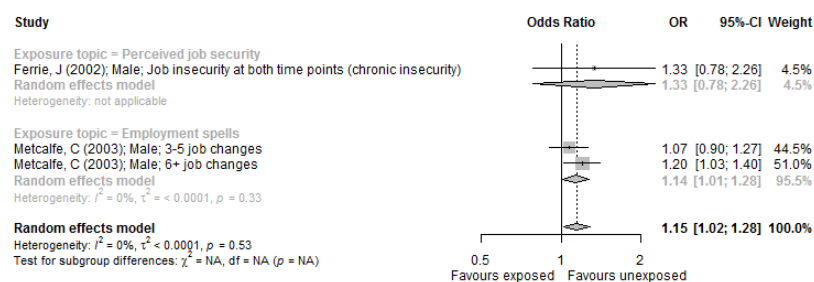

(e) Male current smoking status

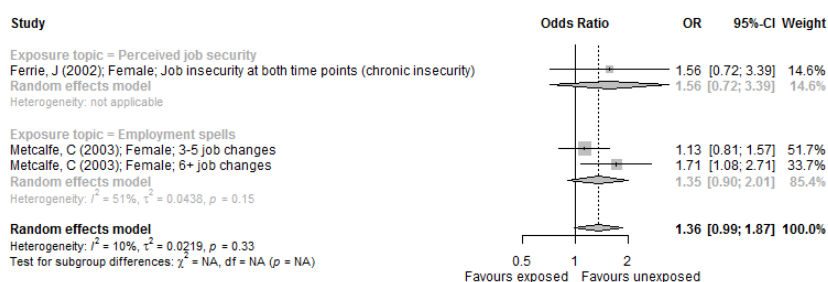

(f) Female current smoking status

**Figure 6.4: Forest plots presenting effect sizes and meta-analysis of selected health behaviour outcomes by persistent precarious employment exposure**

## **Additional File 7: Sensitivity analysis**

We have presented sensitivity analyses of the meta-analyses presented in our main analysis, excluding studies classed as high risk of bias using a modified version of the Effective Practice in Public Health Project (EPHPP) tool. All-cause mortality and symptoms of poor mental health as a continuous outcome measure on the CES-D scale had no high risk of bias studies and are not presented as part of the sensitivity analysis. The findings of our review were not qualitatively changed by excluding high risk of bias studies.

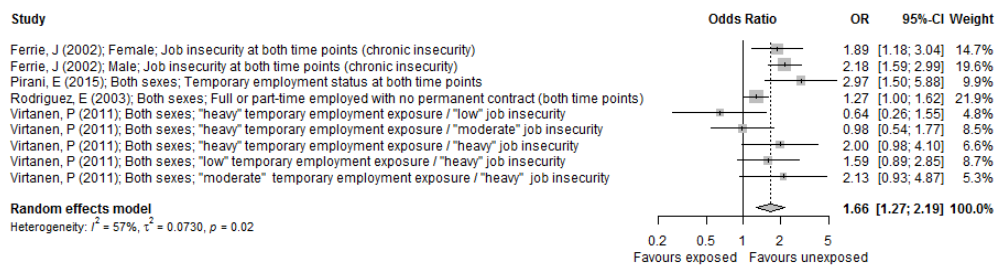

(a) Poor self-rated health as a binary outcome

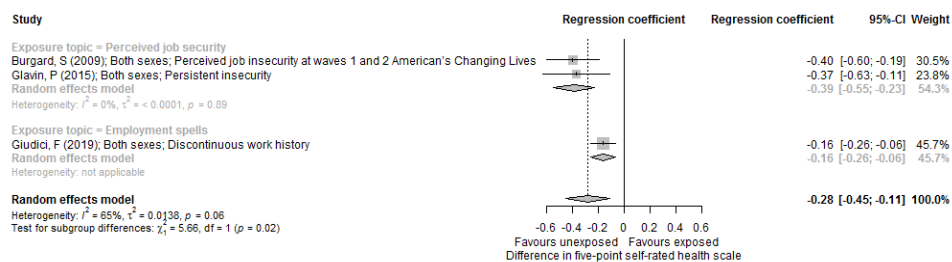

(b) Self-rated health as a continuous scale

**Figure 7.1: Forest plots presenting effect sizes and meta-analysis of selected general health outcomes by persistent precarious employment exposure**

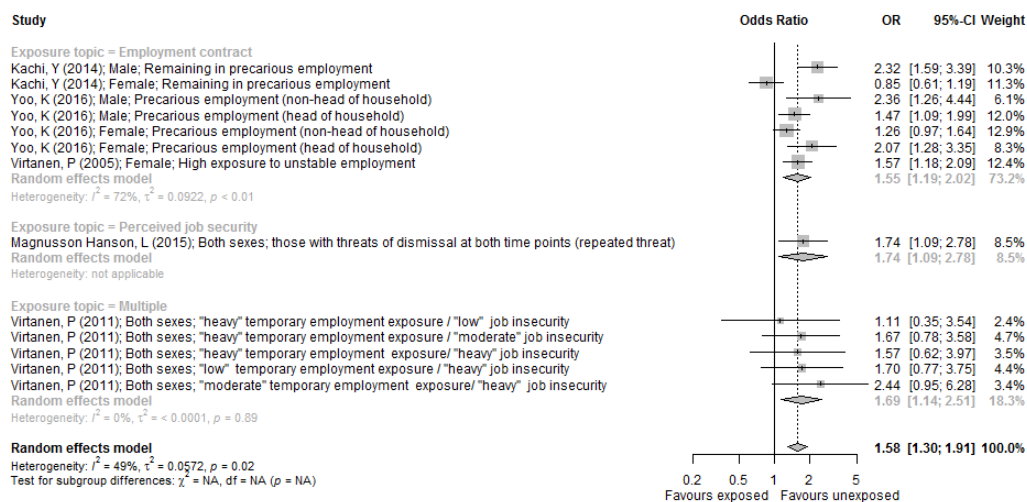

(a) Poor mental health as a binary outcome

**Figure 7.2: Forest plots presenting effect sizes and meta-analysis of selected mental health outcomes by persistent precarious employment exposure**

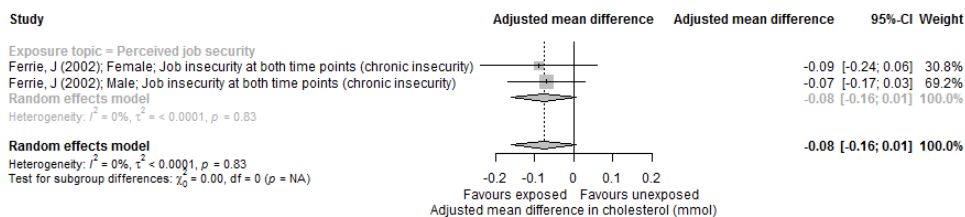

(a) Cholesterol level

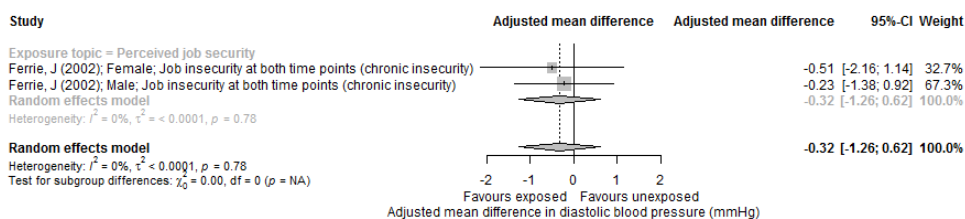

(b) Diastolic blood pressure

**Figure 7.3: Forest plots presenting effect sizes and meta-analysis of selected physical health outcomes by persistent precarious employment exposure**

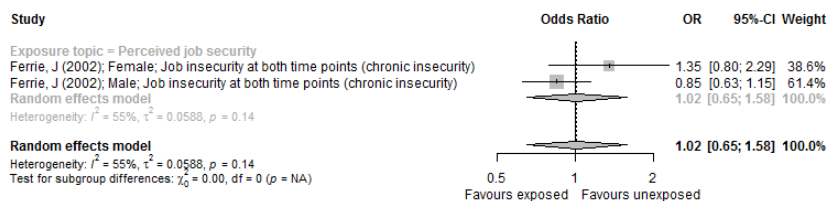

(a) Harmful alcohol consumption

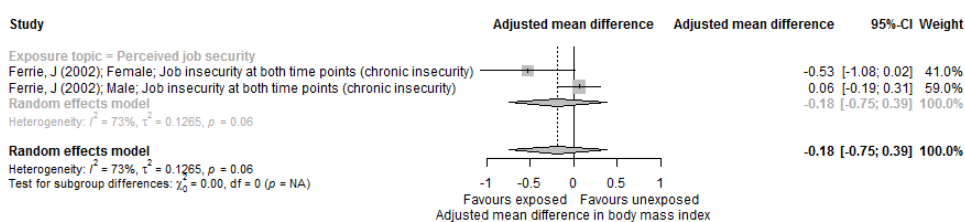

(b) Body mass index

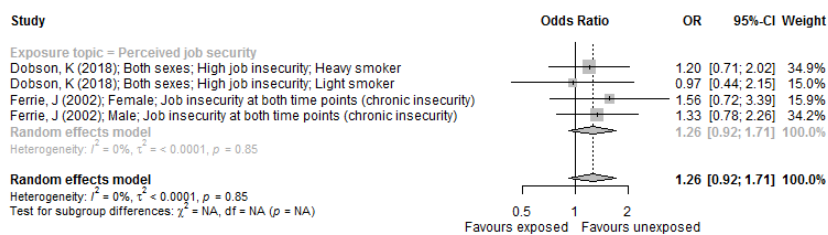

(c) Current smoking status

**Figure 7.4: Forest plots presenting effect sizes and meta-analysis of selected health behaviour outcomes by persistent precarious employment exposure**

## **Additional file 8: Narrative synthesis and meta-analysis of other health outcomes**

### **Data analysis and presentation**

We initially tabulated extracted data by the type of exposure and outcome. Due to the wide range of outcome measures included in this review, a narrative synthesis was undertaken using vote counting based on the direction of effect for all exposure/outcome groupings following Cochrane guidance.[1] An exact binomial test was run for each exposure/outcome grouping with confidence intervals calculated using the Wilson method.[1] Harvest plots were created to visually summarise the direction of effect estimates by outcome as a means of synthesising studies where there were a mix of binary and continuous exposure and outcomes measures, meaning that meta-analysis was not feasible.[1, 2]

### **Physical health outcomes**

Persistent precarious employment was associated with lower cholesterol (adjusted mean difference -0.07 mmol/l, CI -0.15 to -0.01,  $I^2$  25%) based on two studies [4, 5] (Figure 8.1(a)). When stratified by exposure topic, the separate studies showed similar effect sizes. Persistent precarious employment was associated with lower diastolic blood pressure when meta-analysed (-0.54 mmHg, CI -0.99 to -0.08,  $I^2$  0%) (Figure 8.1(b)).



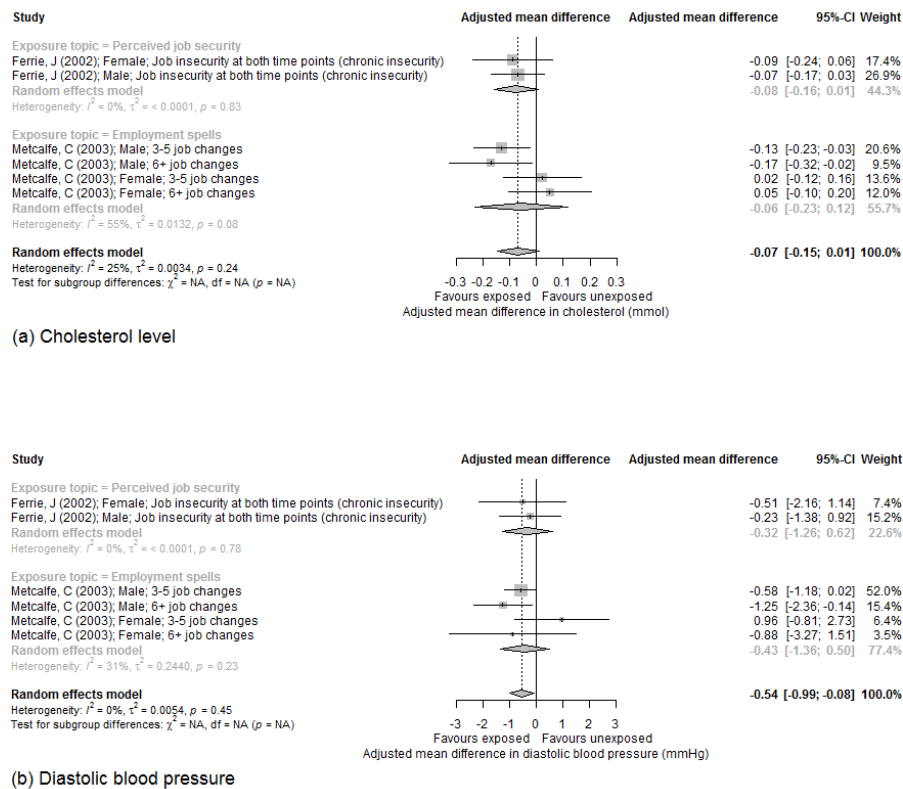

**Figure 8.1: Forest plots presenting effect sizes and meta-analysis of selected physical health outcomes by persistent precarious employment exposure**

## Health behaviour outcomes

Our meta-analysis of persistent precarious employment and harmful alcohol consumption suggested an association with increased odds (OR 1.29, CI 0.92 to 1.81,  $I^2$  68%) based on two studies [4, 5] (Figure 8.2(a)). It should be noted that the two studies used different thresholds for harmful alcohol consumption and for different sexes. Both studies used a threshold of 22 or more units of alcohol per week for harmful drinking among men. For women, Ferrie et al.[5] used a threshold of 15 or more units of alcohol per week, while Metcalfe et al.[4] used a threshold of eight or more units of alcohol per week. No association was found between persistent precarious employment and body mass index based on the pooled adjusted mean differences from two studies (Adjusted mean difference

0.03, 95% CI -0.08 to 0.14,  $I^2$  1%) [4, 5] (Figure 8.2(b)). Persistent precarious employment was found to be associated with current smoking status based on the pooled estimates from three studies (OR 1.17, CI 1.06 to 1.29,  $I^2$  0%) [4-6] (Figure 8.2(c)).

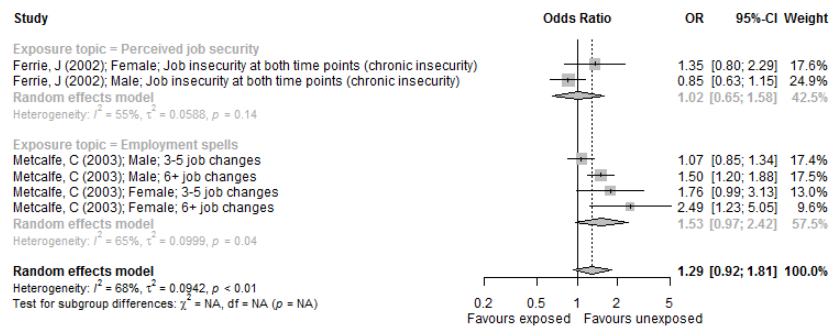

(a) Harmful alcohol consumption

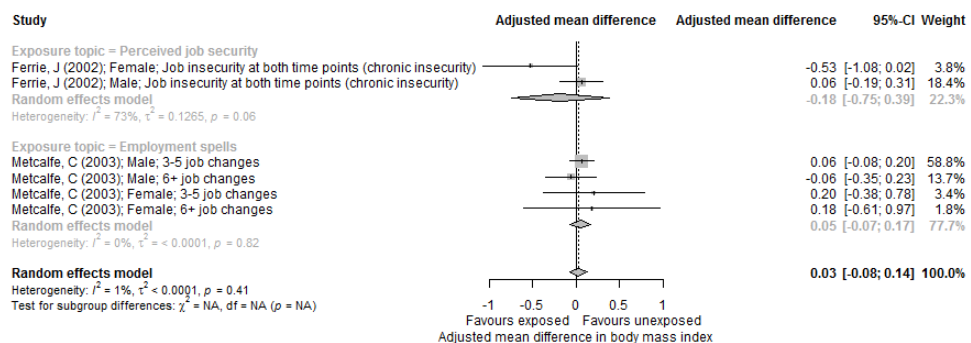

(b) Body mass index

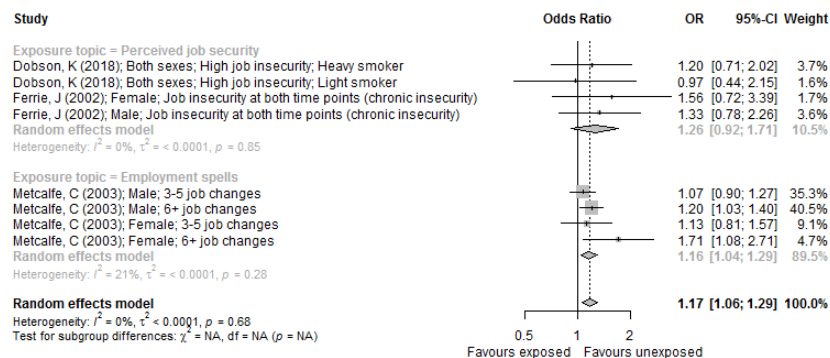

(c) Current smoking status

**Figure 8.2: Forest plots presenting effect sizes and meta-analysis of selected health behaviour outcomes by persistent precarious employment exposure**

All three outcomes that we assessed were downgraded to very low overall certainty when assessed using the GRADE framework (Table 1). All outcomes except for self-rated health were rated down on risk of bias, while two outcomes were rated down on inconsistency (all-cause mortality and self-rated health), and one outcome on imprecision (alcohol consumption).

## REFERENCES

- 1 McKenzie J, Brennan S. Chapter 12: Synthesizing and presenting findings using other methods. In: Higgins J, Thomas J, Chandler J, *et al.*, eds. *Cochrane Handbook for Systematic Reviews of Interventions version 62 (updated February 2021)*: Cochrane 2021.
- 2 Ogilvie D, Fayter D, Petticrew M, *et al.* The harvest plot: A method for synthesising evidence about the differential effects of interventions. *BMC Medical Research Methodology* 2008;**8**:8.
- 3 Giraud M, Bena A, Leombruni R, *et al.* Occupational injuries in times of labour market flexibility: the different stories of employment-secure and precarious workers. *BMC Public Health* 2016;**16**:150.
- 4 Metcalfe C, Davey Smith G, Sterne JA, *et al.* Frequent job change and associated health. *Social Science & Medicine* 2003;**56**:1-15.
- 5 Ferrie JE, Shipley MJ, Stansfeld SA, *et al.* Effects of chronic job insecurity and change in job security on self reported health, minor psychiatric morbidity, physiological measures, and health related behaviours in British civil servants: The Whitehall II study. *Journal of Epidemiology and Community Health* 2002;**56**:450-4.
- 6 Dobson KG, Gilbert-Ouimet M, Mustard C, *et al.* Association between dimensions of the psychosocial and physical work environment and latent smoking trajectories: a 16-year cohort study of the Canadian workforce: Supplementary File. *Occupational and Environmental Medicine* 2018;**75**.

## Additional file 9: GRADE assessment of certainty table for other health outcomes

| GRADE assessment of certainty |                                                                       |                                       |                                      |                                                                     |                  |                   |                        |                                                 |               |                                 |                                      |
|-------------------------------|-----------------------------------------------------------------------|---------------------------------------|--------------------------------------|---------------------------------------------------------------------|------------------|-------------------|------------------------|-------------------------------------------------|---------------|---------------------------------|--------------------------------------|
| Outcome                       | Risk of bias                                                          | Inconsistency                         | Indirectness                         | Imprecision                                                         | Publication bias | Number of studies | Number of participants | Relative difference (95%CI)                     | Absolute risk |                                 | Certainty (reasons for downgrading)  |
|                               |                                                                       |                                       |                                      |                                                                     |                  |                   |                        |                                                 | Medium risk   | Exposed risk (95%CI)            |                                      |
| Diastolic blood pressure      | Serious limitations (uncontrolled confounding and exposure integrity) | No serious inconsistency              | No serious indirectness (borderline) | No serious imprecision                                              | Undetected       | 2                 | 9,705                  | Adjusted mean difference = -0.54 (-0.99; -0.08) | 76.9mmHg [5]  | 76.4mmHg (75.9mmHg to 76.8mmHg) | Very low (risk of bias)              |
| Alcohol consumption           | Serious limitations (uncontrolled confounding and exposure integrity) | No serious inconsistency (borderline) | No serious indirectness (borderline) | Serious imprecision (95% CI includes 1 appreciable benefit or harm) | Undetected       | 2                 | 9,705                  | OR = 1.29 (0.92; 1.81)                          | 43.0%***      | 55.5% (41.0% to 57.7%)          | Very low (risk of bias, imprecision) |
| Current smoker                | Serious limitations (uncontrolled confounding and exposure integrity) | No serious inconsistency              | No serious indirectness (borderline) | No serious imprecision                                              | Undetected       | 3                 | 15,166                 | OR = 1.17 (1.06; 1.29)                          | 16.0%***      | 18.7% (16.8% to 19.7%)          | Very low (risk of bias)              |

\* <http://healthsurvey.hscic.gov.uk/data-visualisation/data-visualisation/explore-the-trends/general-health.aspx>

\*\* <http://healthsurvey.hscic.gov.uk/support-guidance/public-health/health-survey-for-england-2016/well-being-and-mental-health.aspx>

\*\*\* <https://files.digital.nhs.uk/D4/93337C/HSE19-Adult-health-behaviours-rep.pdf>

**Table 9.1: GRADE assessment of certainty of estimate of effect size and summary of findings**

## Additional File 10: Funnel plots

We have presented funnel plots for PECOS combinations with ten or more data points.

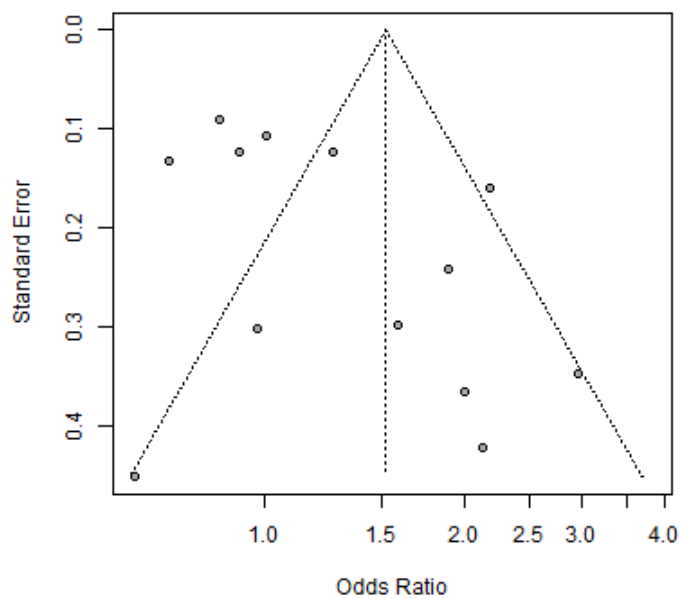

**Figure S8.1: Funnel plot for studies reporting poor self-rated health as a binary outcome**

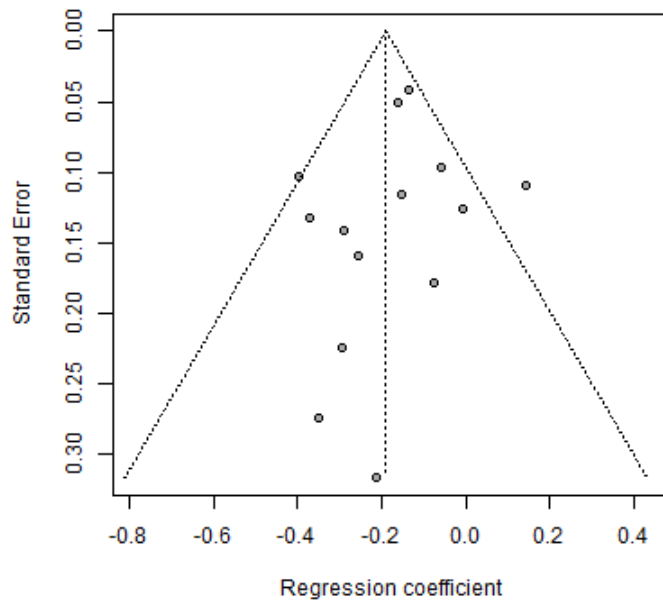

Figure S8.2: Funnel plot for studies reporting self-rated health as a continuous scale

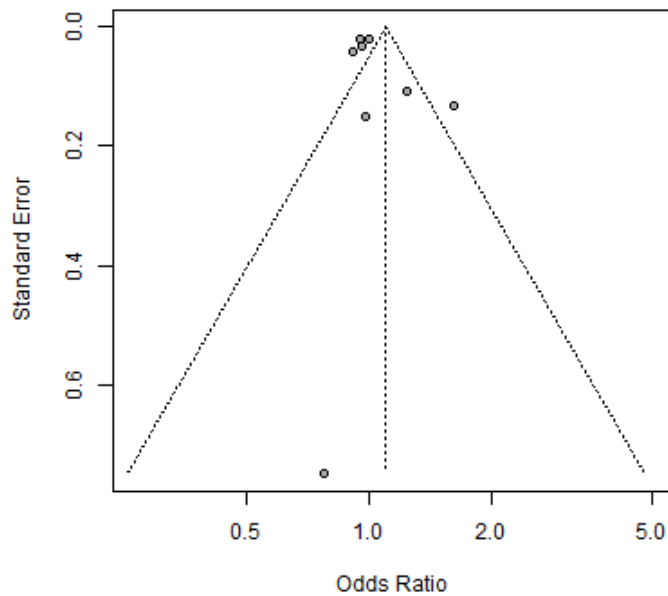

Figure S8.3: Funnel plot for studies reporting all-cause mortality

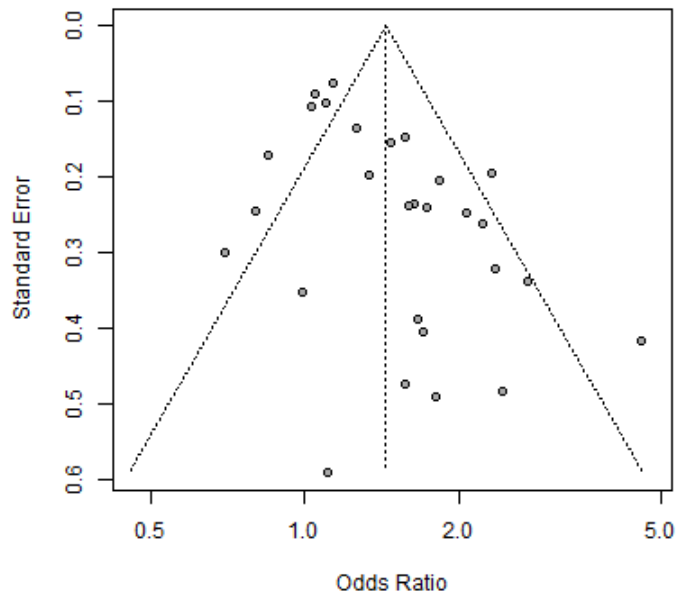

**Figure S8.4: Funnel plot for studies reporting poor mental health as a binary outcome**
