# Supplementary material for: Does persistent precarious employment affect health outcomes among working age adults? A systematic review and meta-analysis
Source: HighWire-hosted journal article supplement (doi:10.1136/jech-2022-219292), 2022-09-22
Supplement: jech-2022-219292supp003_data_supplement.pdf [file jech-2022-219292supp003_data_supplement.pdf]

Additional file 3: Quality appraisal rating procedure, full quality appraisal and appraisal ratings of included articles

| First author        | Year published | Representativeness of target population | Participation Rate | Selection Bias Quality | Study Design | Randomized | Randomized (Method Specified) | Randomized (Appropriate) | Study Design Quality | Group Differences Pre-Exposure | % Confounders Controlled | Over adjustment | Confounder Quality | Researcher Awareness | Participants Awareness | Blinding Quality | Data Collection Tool Validity | Data Collection Tool Reliability | Data Collection Methods Quality | Withdrawals and Drop-Outs Reported | Attrition | Method for dealing with withdrawals/drop-outs | Withdrawals and Drop-Outs Quality | % Participants in Exposure | Consistency of Exposure Measured | Contamination Co-Exposure | Exposure Intensity Quality | Unit of allocation | Unit of analysis | Appropriateness of Statistical Methods | Analysis Quality | Global Rating |
|---------------------|----------------|-----------------------------------------|--------------------|------------------------|--------------|------------|-------------------------------|--------------------------|----------------------|--------------------------------|--------------------------|-----------------|--------------------|----------------------|------------------------|------------------|-------------------------------|----------------------------------|---------------------------------|------------------------------------|-----------|-----------------------------------------------|-----------------------------------|----------------------------|----------------------------------|---------------------------|----------------------------|--------------------|------------------|----------------------------------------|------------------|---------------|
| Amick, B            | 2005           | 1                                       | 5                  | 2                      | 3            | 1          | 1                             | 3                        | 2                    | 3                              | 1                        | 2               | 2                  | 2                    | 2                      | 2                | 1                             | 1                                | 1                               | 1                                  | 4         | 3                                             | 3                                 | 3                          | 1                                | 2                         | 1                          | 1                  | 1                | 1                                      | 2                |               |
| Barbados, P         | 2016           | 2                                       | 5                  | 2                      | 6            | 1          | 2                             | 2                        | 2                    | 1                              | 2                        | 1               | 2                  | 2                    | 2                      | 1                | 1                             | 1                                | 1                               | 4                                  | 7         | 4                                             | NA                                | 3                          | 1                                | 2                         | 2                          | 1                  | 1                | 3                                      | 2                |               |
| Barnett, R          | 1997           | 2                                       | 2                  | 2                      | 3            | 1          | 2                             | 2                        | 2                    | 1                              | 2                        | 1               | 2                  | 1                    | 1                      | 3                | 1                             | 1                                | 1                               | 2                                  | 2         | 2                                             | 3                                 | 4                          | 1                                | 2                         | 2                          | 1                  | 1                | 1                                      | 3                |               |
| Bender, K           | 2018           | 1                                       | 5                  | 2                      | 3            | 1          | 2                             | 2                        | 2                    | 1                              | 2                        | 1               | 2                  | 2                    | 2                      | 1                | 1                             | 1                                | 1                               | 1                                  | 2         | 1                                             | 2                                 | 4                          | 1                                | 2                         | 2                          | 2                  | 2                | 1                                      | 1                |               |
| Burgard, S          | 2017           | 1                                       | 2                  | 2                      | 3            | 1          | 2                             | 2                        | 2                    | 1                              | 2                        | 1               | 2                  | 2                    | 2                      | 1                | 1                             | 1                                | 1                               | 1                                  | 3         | 3                                             | 2                                 | 3                          | 1                                | 2                         | 2                          | 1                  | 1                | 1                                      | 1                |               |
| Burgard, S          | 2009a          | 1                                       | 2                  | 2                      | 3            | 1          | 2                             | 2                        | 2                    | 1                              | 1                        | 1               | 1                  | 2                    | 2                      | 1                | 1                             | 1                                | 1                               | 1                                  | 2         | 1                                             | 2                                 | 3                          | 2                                | 2                         | 3                          | 1                  | 1                | 1                                      | 2                |               |
| Burgard, S          | 2009b          | 1                                       | 2                  | 2                      | 3            | 1          | 2                             | 2                        | 2                    | 1                              | 1                        | 1               | 1                  | 2                    | 2                      | 1                | 3                             | 3                                | 2                               | 2                                  | 2         | 3                                             | 3                                 | 3                          | 2                                | 2                         | 3                          | 1                  | 1                | 1                                      | 3                |               |
| Burr, H             | 2015           | 1                                       | 2                  | 2                      | 6            | 1          | 1                             | 3                        | 3                    | 1                              | 2                        | 1               | 2                  | 2                    | 2                      | 1                | 3                             | 3                                | 2                               | 4                                  | 7         | 4                                             | NA                                | 3                          | 1                                | 2                         | 2                          | 1                  | 1                | 1                                      | 2                |               |
| Carveth, C          | 2017           | 1                                       | 3                  | 3                      | 3            | 1          | 2                             | 2                        | 2                    | 1                              | 3                        | 2               | 3                  | 2                    | 2                      | 1                | 1                             | 1                                | 1                               | 1                                  | 3         | 3                                             | 2                                 | 3                          | 1                                | 2                         | 2                          | 1                  | 3                | 3                                      | 3                |               |
| Coley, R            | 2014           | 2                                       | 1                  | 2                      | 3            | 1          | 2                             | 2                        | 2                    | 1                              | 2                        | 1               | 2                  | 2                    | 2                      | 1                | 2                             | 2                                | 2                               | 1                                  | 3         | 1                                             | 2                                 | 3                          | 1                                | 2                         | 2                          | 1                  | 1                | 1                                      | 1                |               |
| Cross, J            | 2009           | 1                                       | 1                  | 1                      | 3            | 1          | 2                             | 2                        | 2                    | 1                              | 1                        | 2               | 2                  | 2                    | 2                      | 1                | 1                             | 1                                | 1                               | 1                                  | 6         | 1                                             | 3                                 | 4                          | 1                                | 2                         | 2                          | 1                  | 1                | 1                                      | 2                |               |
| Dobson, K           | 2018           | 1                                       | 5                  | 2                      | 3            | 1          | 2                             | 2                        | 2                    | 1                              | 2                        | 2               | 2                  | 2                    | 2                      | 1                | 1                             | 1                                | 1                               | 1                                  | 1         | 1                                             | 3                                 | 1                          | 2                                | 2                         | 1                          | 1                  | 1                | 1                                      | 1                |               |
| Dodley, D           | 1998           | 1                                       | 1                  | 1                      | 3            | 1          | 2                             | 2                        | 2                    | 3                              | 3                        | 2               | 3                  | 2                    | 2                      | 1                | 1                             | 1                                | 1                               | 1                                  | 1         | 3                                             | 2                                 | 3                          | 1                                | 2                         | 2                          | 1                  | 1                | 1                                      | 2                |               |
| Emerson, E          | 2018           | 2                                       | 5                  | 2                      | 3            | 1          | 2                             | 3                        | 2                    | 3                              | 3                        | 2               | 3                  | 2                    | 2                      | 2                | 1                             | 1                                | 1                               | 1                                  | 4         | 1                                             | 2                                 | 3                          | 1                                | 2                         | 2                          | 1                  | 1                | 1                                      | 2                |               |
| Ferne, J            | 2002           | 1                                       | 5                  | 2                      | 3            | 1          | 1                             | 2                        | 2                    | 1                              | 3                        | 2               | 2                  | 2                    | 2                      | 1                | 1                             | 1                                | 1                               | 1                                  | 2         | 3                                             | 2                                 | 3                          | 1                                | 2                         | 2                          | 1                  | 1                | 1                                      | 1                |               |
| Fiori, P            | 2016           | 1                                       | 5                  | 2                      | 6            | 1          | 1                             | 3                        | 3                    | 3                              | 2                        | 2               | 2                  | 2                    | 2                      | 1                | 1                             | 1                                | 1                               | 4                                  | 7         | 4                                             | NA                                | 4                          | 1                                | 2                         | 2                          | 1                  | 1                | 1                                      | 1                | 2             |
| Gallo, W            | 2006           | 1                                       | 2                  | 2                      | 3            | 1          | 1                             | 3                        | 2                    | 3                              | 1                        | 2               | 2                  | 2                    | 2                      | 1                | 1                             | 1                                | 1                               | 2                                  | 6         | 1                                             | 3                                 | 3                          | 2                                | 2                         | 3                          | 1                  | 1                | 1                                      | 3                |               |
| Giraud, M           | 2016           | 1                                       | 1                  | 1                      | 3            | 1          | 1                             | 3                        | 2                    | 3                              | 3                        | 2               | 3                  | 2                    | 2                      | 1                | 1                             | 1                                | 1                               | 4                                  | 7         | 4                                             | NA                                | 3                          | 2                                | 2                         | 2                          | 1                  | 1                | 1                                      | 1                | 2             |
| Giudici, F          | 2019           | 1                                       | 1                  | 1                      | 3            | 1          | 2                             | 2                        | 2                    | 1                              | 2                        | 1               | 2                  | 2                    | 2                      | 1                | 1                             | 1                                | 1                               | 1                                  | 1         | 1                                             | 1                                 | 3                          | 1                                | 2                         | 2                          | 1                  | 1                | 1                                      | 1                | 1             |
| Glavin, P           | 2015           | 1                                       | 2                  | 2                      | 3            | 1          | 2                             | 2                        | 2                    | 1                              | 1                        | 1               | 1                  | 2                    | 2                      | 1                | 1                             | 1                                | 1                               | 4                                  | 4         | 1                                             | 2                                 | 3                          | 1                                | 2                         | 2                          | 1                  | 1                | 1                                      | 1                | 1             |
| Gustafsson, P       | 2012           | 1                                       | 5                  | 2                      | 3            | 1          | 2                             | 2                        | 2                    | 1                              | 2                        | 2               | 2                  | 2                    | 2                      | 1                | 1                             | 1                                | 1                               | 1                                  | 2         | 3                                             | 2                                 | 3                          | 1                                | 2                         | 2                          | 1                  | 1                | 1                                      | 1                | 1             |
| Heaney, C           | 1994           | 1                                       | 2                  | 2                      | 3            | 1          | 2                             | 2                        | 2                    | 3                              | 3                        | 1               | 3                  | 1                    | 1                      | 3                | 1                             | 1                                | 1                               | 1                                  | 5         | 3                                             | 3                                 | 4                          | 1                                | 2                         | 2                          | 1                  | 1                | 1                                      | 1                | 3             |
| Helgadóttir, B      | 2019           | 4                                       | 3                  | 3                      | 3            | 1          | 1                             | 3                        | 3                    | 1                              | 1                        | 2               | 1                  | 2                    | 2                      | 1                | 2                             | 2                                | 2                               | 4                                  | 4         | 4                                             | NA                                | 3                          | 2                                | 2                         | 2                          | 1                  | 1                | 1                                      | 1                | 3             |
| Jahn, I             | 1995           | 2                                       | 3                  | 3                      | 4            | 1          | 1                             | 3                        | 2                    | 1                              | 3                        | 2               | 2                  | 2                    | 2                      | 1                | 1                             | 2                                | 2                               | 4                                  | 7         | 4                                             | NA                                | 3                          | 2                                | 2                         | 2                          | 1                  | 1                | 1                                      | 1                | 3             |
| Jin-man, C          | 2015           | 1                                       | 5                  | 2                      | 3            | 2          | 1                             | 3                        | 2                    | 3                              | 2                        | 2               | 2                  | 2                    | 2                      | 1                | 1                             | 1                                | 1                               | 1                                  | 1         | 3                                             | 2                                 | 4                          | 1                                | 2                         | 2                          | 1                  | 1                | 1                                      | 1                | 1             |
| Johannessen, H      | 2013           | 2                                       | 2                  | 2                      | 3            | 1          | 1                             | 3                        | 3                    | 3                              | 2                        | 2               | 2                  | 2                    | 1                      | 3                | 1                             | 1                                | 1                               | 1                                  | 3         | 2                                             | 3                                 | 4                          | 1                                | 2                         | 2                          | 1                  | 1                | 1                                      | 1                | 3             |
| Kachi, Y            | 2014           | 1                                       | 1                  | 1                      | 3            | 1          | 2                             | 2                        | 2                    | 1                              | 1                        | 2               | 1                  | 2                    | 2                      | 1                | 1                             | 1                                | 1                               | 1                                  | 1         | 3                                             | 2                                 | 3                          | 1                                | 2                         | 2                          | 1                  | 1                | 1                                      | 1                | 1             |
| Kachi, Y            | 2018           | 1                                       | 3                  | 3                      | 3            | 1          | 2                             | 2                        | 2                    | 1                              | 1                        | 2               | 1                  | 2                    | 2                      | 1                | 1                             | 1                                | 1                               | 1                                  | 3         | 3                                             | 3                                 | 3                          | 1                                | 2                         | 2                          | 1                  | 1                | 1                                      | 1                | 3             |
| Kim, Y              | 2018           | 3                                       | 3                  | 3                      | 3            | 1          | 2                             | 2                        | 2                    | 1                              | 2                        | 1               | 2                  | 2                    | 2                      | 1                | 3                             | 1                                | 2                               | 1                                  | 4         | 2                                             | 3                                 | 3                          | 1                                | 2                         | 2                          | 1                  | 1                | 1                                      | 1                | 3             |
| Kwimaki, M          | 2003           | 2                                       | 5                  | 2                      | 3            | 1          | 2                             | 3                        | 2                    | 3                              | 3                        | 2               | 3                  | 2                    | 2                      | 1                | 1                             | 1                                | 1                               | 4                                  | 1         | 4                                             | 1                                 | 3                          | 1                                | 2                         | 2                          | 1                  | 1                | 1                                      | 1                | 2             |
| Lim, H              | 2015           | 2                                       | 5                  | 2                      | 3            | 1          | 2                             | 2                        | 2                    | 1                              | 3                        | 1               | 3                  | 2                    | 2                      | 1                | 3                             | 1                                | 2                               | 1                                  | 5         | 3                                             | 3                                 | 3                          | 1                                | 2                         | 3                          | 1                  | 1                | 1                                      | 1                | 3             |
| Lopez Gomez, M      | 2017           | 1                                       | 1                  | 1                      | 3            | 1          | 2                             | 2                        | 2                    | 2                              | 3                        | 2               | 3                  | 1                    | 2                      | 2                | 1                             | 1                                | 1                               | 4                                  | 7         | 4                                             | NA                                | 2                          | 1                                | 2                         | 1                          | 1                  | 1                | 1                                      | 1                | 2             |
| Magrusion Hanson, L | 2015           | 1                                       | 2                  | 2                      | 3            | 1          | 2                             | 2                        | 2                    | 1                              | 2                        | 1               | 2                  | 2                    | 2                      | 1                | 1                             | 1                                | 1                               | 1                                  | 4         | 1                                             | 2                                 | 3                          | 1                                | 2                         | 2                          | 1                  | 1                | 1                                      | 1                | 1             |
| Metcalfe, C         | 2001           | 3                                       | 2                  | 3                      | 3            | 1          | 1                             | 3                        | 2                    | 1                              | 2                        | 1               | 2                  | 2                    | 2                      | 1                | 3                             | 2                                | 2                               | 4                                  | 7         | 4                                             | NA                                | 3                          | 2                                | 2                         | 2                          | 1                  | 1                | 1                                      | 1                | 3             |
| Metcalfe, C         | 2003           | 3                                       | 2                  | 3                      | 3            | 1          | 1                             | 3                        | 2                    | 1                              | 2                        | 1               | 2                  | 2                    | 2                      | 1                | 3                             | 2                                | 3                               | 4                                  | 7         | 4                                             | NA                                | 3                          | 2                                | 2                         | 2                          | 1                  | 1                | 1                                      | 1                | 3             |
| Moore, S            | 2004           | 2                                       | 2                  | 2                      | 3            | 1          | 2                             | 2                        | 2                    | 3                              | 3                        | 2               | 3                  | 1                    | 1                      | 3                | 1                             | 1                                | 1                               | 1                                  | 3         | 3                                             | 2                                 | 2                          | 1                                | 2                         | 1                          | 1                  | 1                | 1                                      | 1                | 3             |
| Moscone, F          | 2016           | 2                                       | 4                  | 2                      | 3            | 1          | 2                             | 2                        | 2                    | 1                              | 3                        | 1               | 3                  | 1                    | 2                      | 2                | 1                             | 1                                | 1                               | 4                                  | 7         | 4                                             | NA                                | 4                          | 1                                | 2                         | 2                          | 1                  | 1                | 1                                      | 1                | 2             |
| Pensola, T          | 2004           | 1                                       | 1                  | 1                      | 3            | 1          | 2                             | 2                        | 2                    | 1                              | 2                        | 1               | 2                  | 2                    | 2                      | 1                | 1                             | 1                                | 1                               | 4                                  | 7         | 4                                             | NA                                | 3                          | 1                                | 2                         | 2                          | 1                  | 1                | 1                                      | 1                | 1             |
| Pirani, E           | 2015           | 1                                       | 1                  | 1                      | 3            | 1          | 2                             | 2                        | 2                    | 3                              | 2                        | 2               | 2                  | 2                    | 2                      | 1                | 1                             | 1                                | 1                               | 1                                  | 1         | 1                                             | 1                                 | 3                          | 1                                | 2                         | 2                          | 1                  | 1                | 1                                      | 1                | 1             |
| Reine, I            | 2008           | 1                                       | 1                  | 1                      | 3            | 1          | 1                             | 2                        | 2                    | 1                              | 3                        | 1               | 3                  | 2                    | 2                      | 1                | 1                             | 1                                | 1                               | 1                                  | 1         | 3                                             | 2                                 | 3                          | 2                                | 2                         | 3                          | 1                  | 1                | 1                                      | 1                | 3             |
| Rodriguez, E        | 2002a          | 1                                       | 5                  | 2                      | 3            | 1          | 2                             | 2                        | 2                    | 1                              | 2                        | 2               | 2                  | 2                    | 2                      | 1                | 1                             | 1                                | 1                               | 3                                  | 6         | 1                                             | 2                                 | 3                          | 1                                | 2                         | 2                          | 1                  | 1                | 1                                      | 1                | 1             |
| Rodriguez, E        | 2002b          | 1                                       | 5                  | 2                      | 3            | 1          | 2                             | 2                        | 2                    | 1                              | 2                        | 2               | 2                  | 2                    | 2                      | 1                | 1                             | 1                                | 1                               | 1                                  | 6         | 1                                             | 2                                 | 3                          | 1                                | 2                         | 2                          | 1                  | 1                | 1                                      | 1                | 1             |
| Ruquiles, R         | 2010           | 2                                       | 3                  | 3                      | 3            | 1          | 2                             | 2                        | 2                    | 1                              | 2                        | 2               | 2                  | 2                    | 2                      | 1                | 1                             | 1                                | 1                               | 4                                  | 7         | 4                                             | NA                                | 3                          | 1                                | 2                         | 2                          | 1                  | 1                | 1                                      | 1                | 2             |
| Sato, Y             | 2018           | 1                                       | 3                  | 3                      | 6            | 1          | 2                             | 2                        | 2                    | 1                              | 1                        | 2               | 1                  | 2                    | 2                      | 1                | 1                             | 1                                | 1                               | 4                                  | 7         | 4                                             | NA                                | 3                          | 1                                | 2                         | 2                          | 1                  | 1                | 1                                      | 1                | 2             |
| Scott-Marshall, H   | 2019           | 2                                       | 2                  | 2                      | 3            | 1          | 1                             | 3                        | 2                    | 1                              | 3                        | 2               | 2                  | 2                    | 2                      | 1                | 1                             | 1                                | 1                               | 2                                  | 2         | 3                                             | 3                                 | 4                          | 1                                | 2                         | 2                          | 1                  | 1                | 1                                      | 1                | 3             |
| Sivico, A           | 2012           | 1                                       | 2                  | 2                      | 3            | 1          | 1                             | 3                        | 2                    | 1                              | 3                        | 1               | 3                  | 2                    | 2                      | 1                | 3                             | 3                                | 3                               | 1                                  | 2         | 3                                             | 2                                 | 3                          | 3                                | 3                         | 3                          | 1                  | 1                | 1                                      | 1                | 3             |
| Virtanen, P         | 2005           | 2                                       | 2                  | 2                      | 3            | 1          | 1                             | 3                        | 2                    | 1                              | 2                        | 2               | 2                  | 2                    | 2                      | 1                | 1                             | 1                                | 1                               | 1                                  | 2         | 3                                             | 2                                 | 3                          | 1                                | 2                         | 2                          | 1                  | 1                | 1                                      | 1                | 1             |
| Virtanen, P         | 2008           | 1                                       | 3                  | 3                      | 3            | 1          | 1                             | 3                        | 2                    | 1                              | 3                        | 2               | 2                  | 2                    | 2                      | 1                | 1                             | 1                                | 1                               | 1                                  | 1         | 3                                             | 2                                 | 3                          | 1                                | 2                         | 2                          | 1                  | 1                | 1                                      | 1                | 2             |
| Virtanen, P         | 2011           | 1                                       | 5                  | 2                      | 3            | 1          | 2                             | 2                        | 2                    | 1                              | 3                        | 2               | 2                  | 2                    | 2                      | 1                | 1                             | 1                                | 1                               | 2                                  | 3         | 2                                             | 3                                 | 1                          | 2                                | 2                         | 1                          | 1                  | 1                | 1                                      | 1                | 1             |
| Virtanen, P         | 2018           | 2                                       | 2                  | 2                      | 3            | 1          | 1                             | 2                        | 2                    | 3                              | 3                        | 2               | 3                  | 2                    | 2                      | 1                | 1                             | 1                                | 1                               | 1                                  | 5         | 3                                             | 3                                 | 3                          | 1                                | 2                         | 2                          | 1                  | 1                | 1                                      | 1                | 3             |
| Watson, B           | 2017           | 1                                       | 5                  | 2                      | 3            | 1          | 2                             | 2                        | 2                    | 3                              | 1                        | 1               | 3                  | 2                    | 2                      | 1                | 1                             | 1                                | 1                               | 1                                  | 2         | 1                                             | 2                                 | 3                          | 1                                | 2                         | 2                          | 1                  | 1                | 1                                      | 1                | 2             |
| Yoo, K              | 2016           | 1                                       | 5                  | 2                      | 3            | 1          | 2                             | 2                        | 2                    | 1                              | 2                        | 1               | 2                  | 2                    | 2                      | 2                | 1                             | 1                                | 1                               | 1                                  | 2         | 2                                             | 3                                 | 3                          | 1                                | 2                         | 2                          | 1                  | 1                | 1                                      | 1                | 2             |
